1 **Title:**

2 **Individual and combined effects of Cannabidiol (CBD) and  $\Delta$ 9-tetrahydrocannabinol (THC) on**  
3 **striato-cortical connectivity in the human brain**

4

5 Matthew B. Wall<sup>1,2,3</sup>, Tom P. Freeman<sup>2,4</sup>, Chandni Hindocha<sup>2</sup>, Lysia Demetriou<sup>1,3</sup>, Natalie Ertl<sup>1,3</sup>,  
6 Abigail M. Freeman<sup>2</sup>, Augustus PM Jones<sup>5</sup>, Will Lawn<sup>2</sup>, Rebecca Pope<sup>2</sup>, Claire Mokrysz<sup>2</sup>, Daniel  
7 Solomons<sup>3</sup>, Ben Statton<sup>6</sup>, Hannah R. Walker<sup>5</sup>, Yumeya Yamamori<sup>5</sup>, Zixu Yang<sup>3</sup>, Jocelyn L.L. Yim<sup>5</sup>,  
8 David J. Nutt<sup>3</sup>, Oliver D. Howes<sup>6,7,8</sup>, H. Valerie Curran<sup>2</sup>, & Michael Bloomfield<sup>5</sup>

9

10 <sup>1</sup>Invicro London, Burlington Danes Building, Hammersmith Hospital, Du Cane Road, London, W12 0NN, UK

11 <sup>2</sup>Clinical Psychopharmacology Unit, University College London, 1-19 Torrington Place, London, WC1E 7HB, UK.

12 <sup>3</sup>Division of Brain Sciences, Imperial College London, Hammersmith Campus, Du Cane Road, London, W12  
13 0NN, UK

14 <sup>4</sup>Addiction and Mental Health Group (AIM), Department of Psychology, University of Bath, Bath, UK

15 <sup>5</sup>Division of Psychiatry, University College London, B Wing, 6<sup>th</sup> Floor, Maple House, 149 Tottenham Court  
16 Road, London, W1T 7BN, UK

17 <sup>6</sup>MRC London Institute of Medical Sciences, Hammersmith Hospital Campus, London, UK.

18 <sup>7</sup>Department of Psychosis Studies, Institute of Psychiatry, Psychology and Neuroscience, King's College  
19 London, De Crespigny Park, London, UK.

20 <sup>8</sup>South London and the Maudsley NHS Foundation Trust, London, UK.

21

22 **Corresponding Author:**

23 Matthew Wall

24 Invicro London

25 Burlington Danes Building

26 Hammersmith Hospital

27 Du Cane Road

28 London, W12 0NN

29 United Kingdom

30 [matt.wall@incicro.co.uk](mailto:matt.wall@incicro.co.uk)

31

32 **Financial disclosure**

33 There are no relevant financial disclosures.

34 **Conflict of Interest Statement**

35 Authors MBW, LD, and NE's primary employer is Invicro LLC., a private company which  
36 performs contract research work for the pharmaceutical and bio-technology industries.

## 37 **Abstract**

38 Cannabidiol (CBD) and  $\Delta^9$ -tetrahydrocannabinol (THC) are two major constituents of cannabis  
39 with contrasting mechanisms of action. THC is the major psychoactive, addiction-promoting,  
40 and psychotomimetic compound, while CBD may have somewhat opposite effects. The brain  
41 effects of these drugs alone and in combination are poorly understood. In particular the  
42 striatum is implicated in the pathophysiology of several psychiatric disorders, but it is unclear  
43 how THC and CBD influence striato-cortical connectivity. Across two placebo-controlled,  
44 double-blind studies, we examine the effects of THC, CBD, and THC+CBD on the functional  
45 connectivity of striatal sub-divisions (associative, limbic, and sensorimotor) using resting-state  
46 functional Magnetic Resonance Imaging (fMRI) and seed-based functional connectivity  
47 analyses. Study 1 (N=17; inhaled 8mg THC, 8mg THC+10mg CBD, placebo) showed strong  
48 disruptive effects of both THC and THC+CBD conditions on connectivity in the associative and  
49 sensorimotor networks, but a specific effect of THC in the limbic striatum, which was alleviated  
50 in the THC+CBD condition such that it did not differ from placebo. In Study 2 (N=23, oral 600mg  
51 CBD, placebo) CBD increased connectivity in the associative network, but relatively minor  
52 decreases/disruptions were found in the limbic and sensorimotor. In conclusion, THC strongly  
53 disrupts striato-cortical networks, and this effect is selectively mitigated in the limbic striatum  
54 when co-administered with CBD. When administered alone, 600mg oral CBD has a more  
55 complex effect profile of relative increases and decreases in connectivity. The insula emerges as  
56 a key region affected by cannabinoid-induced changes in functional connectivity, with potential  
57 implications for understanding cannabis related disorders, and the development of cannabinoid  
58 therapeutics.

59

## 60 **Introduction**

61 Cannabis is a widely used recreational drug and has been used as such by humans for  
62 thousands of years for recreational, spiritual and medical purposes. The pharmacology of  
63 cannabis is complex, with almost 150 known cannabinoid compounds present in naturally  
64 occurring cannabis plant matter (Hanuš et al., 2016). Two of the major naturally occurring

65 cannabinoids are  $\Delta^9$ -tetrahydrocannabinol (THC) and cannabidiol (CBD). THC is the major  
66 psychoactive compound and is responsible for the majority of the subjective and cognitive  
67 effects (Curran et al., 2002), including apathy, feeling 'stoned', amnesia, anxiety, and  
68 psychotomimetic effects (D'Souza et al., 2004). THC is thought to exert its effects primarily by  
69 partial agonism at the CB1 receptor (Pertwee, 2008). CBD has less well understood and more  
70 complex pharmacological effects, including negative allosteric modulation at the CB1 receptor  
71 (Chesney et al., 2020), reducing reuptake of anandamide, and action on GPR55,  $\mu$ -opioid, and 5-  
72 HT1A receptors (Pertwee, 2008). CBD has antipsychotic, (Leweke et al., 2012; McGuire et al.,  
73 2018), anxiolytic (Bergamaschi et al., 2011a) and anti-addictive (Hindocha et al., 2018; Hurd et  
74 al., 2019; Freeman et al., 2020) properties, and therefore has broadly oppositional  
75 neuropsychopharmacological effects to THC (Curran et al., 2016; Gunasekera et al., 2020).  
76 Experimental studies co-administering THC and CBD have produced mixed results, but the most  
77 common finding was that CBD reduced the effects of THC (Freeman et al., 2019b).

78 Cannabis is currently moving towards a decriminalised or fully legal status in a number of  
79 jurisdictions. There is also renewed interest in the medical uses of cannabinoids, with growth in  
80 their medical licensing (Hasin et al., 2017; Lucas & Walsh, 2017; Freeman et al., 2019a),  
81 particularly for the treatment of chronic and neuropathic pain (Leung, 2011) and mental health  
82 conditions (Walsh et al., 2017). As use of cannabinoids in medical contexts becomes more  
83 widespread, it is vital to understand the intricate pharmacological and physiological  
84 mechanisms behind their potential therapeutic effects. One brain system known to be strongly  
85 affected by both acute and chronic use of cannabis of particular relevance to therapeutic,  
86 recreational, and harmful effects is the dopaminergic system and associated brain regions,  
87 principally the striatum (Bloomfield et al., 2018). The density of CB1 receptors is medium to  
88 high in striatal regions (Glass, Dragunow & Faull, 1997) and previous work has shown  
89 reductions in striatal dopamine function in cannabis users (Bloomfield et al., 2014; Tomasi,  
90 Wang & Volkow, 2015; Van De Giessen et al., 2017), and selective dopamine release in the  
91 limbic subdivision of the striatum with an acute THC challenge (Bossong et al., 2015). Functional  
92 and behavioural data have also shown that cannabis can acutely modulate striatal responses to  
93 hedonic stimuli (Freeman et al., 2017), and impair reward learning (Lawn et al., 2016). Multiple

94 lines of evidence implicate the striatum in the pathophysiology of psychotic disorders (e.g.  
95 Howes et al., 2011; Karcher, Rogers & Woodward, 2019) and the limbic striatum in particular is  
96 the central region in influential theories of addiction (e.g. Robbins & Everitt, 2002; Everitt &  
97 Robbins, 2013). Characterising the effects of THC and CBD on the striatum is therefore vitally  
98 important for understanding its role in the pathophysiology of these disorders, and as a means  
99 to evaluate potential cannabinoid treatments.

100 We therefore sought to investigate the effects of cannabinoids on functional connectivity of the  
101 striatum, using resting-state fMRI. Firstly, we examined the effects of vaporised herbal cannabis  
102 with and without CBD on connectivity in three striatal sub-divisions. In a second study, to  
103 isolate the effects of CBD, we investigated the effects of oral CBD vs. placebo in the same  
104 regions. Our first hypothesis was that THC will disrupt/reduce striato-cortical functional  
105 connectivity particularly in the limbic striatal sub-division. Our second hypothesis was that CBD  
106 would ameliorate these effects when delivered in combination with THC. Our third hypothesis  
107 was that CBD administered alone would produce a qualitatively different pattern of functional  
108 modulations to THC or THC+CBD.

## 109 **Methods**

### 110 **Study 1**

111 Additional data from this study have been published elsewhere (Lawn et al., 2016; Freeman et  
112 al., 2017; Wall et al., 2019). These previous reports did not focus on striato-cortical  
113 connectivity.

#### 114 *Study Design*

115 This study included three drug conditions: cannabis containing both THC and CBD (THC+CBD),  
116 high-THC cannabis without CBD (THC) and placebo cannabis (without either THC or CBD). These  
117 three conditions were used in a randomized, crossover, placebo-controlled, double-blind  
118 design. A Latin Square design was used to randomly assign participants to one of three  
119 condition orders. To avoid carry-over effects the scanning sessions were separated by at least 1  
120 week, which is more than three times the elimination half-life of THC (Hindocha et al., 2015).

121 *Participants*

122 Seventeen healthy volunteers (9 women) between 18 and 70 years old were recruited (mean  
123 age = 26.2, SD = 7.1). The recruitment followed the inclusion criteria for cannabis use of  $\leq 3$   
124 times per week and  $\geq 4$  times in the past year. The participants reported on average 8.1 (SD =  
125 5.5) days/month of cannabis use.

126 Volunteers were excluded if there was current or past history of psychosis in themselves or an  
127 immediate family member and if there were any other medical problems considered clinically  
128 significant for the study. Additionally, drug related exclusion criteria were previous negative  
129 experiences with cannabis, alcohol use was  $> 5$  times per week and use of any other illicit drug  
130  $>$  twice per month. For full demographic data, see Lawn et al. (2016). The study was conducted  
131 in accordance with the Declaration of Helsinki and was approved by the University College  
132 London (UCL) Ethics Committee. Participants provided written informed consent prior to the  
133 first study session and they were reimbursed for their time.

134 *Drug Administration*

135 All three varieties of cannabis were sourced from Bedrocan (The Netherlands), and were  
136 matched for appearance and smell. In each session the same amount of cannabis was  
137 administered (133.4 mg). The THC and CBD doses for the current study were determined based  
138 on previous experiments that used similar vaporisation methods (Bossong et al., 2009;  
139 Hindocha et al., 2015) and Bedrocan product potencies (Niesink et al., 2015). The dose was 8mg  
140 THC in both cannabis conditions (THC, THC+CBD) and 10mg of CBD in the THC+CBD condition.  
141 The THC (8mg) dose has produced subjective, cognitive, and psychotomimetic effects in  
142 previous studies and reflects 1.6 standard units of THC at 5mg (Freeman & Lorenzetti, 2020). All  
143 the cannabis was used within 6 months of purchase and was stored in foil-sealed pouches at  
144  $-20^{\circ}\text{C}$  and then at ambient temperature immediately prior to administration.

145 Each cannabis dose was administered using a Volcano Medic Vaporizer (Storz and Bickel,  
146 Tuttlingen, Germany) in line with previous studies (Bossong et al., 2009; Hindocha et al., 2015;  
147 Mokrysz et al., 2016). The drug was vaporised at  $210^{\circ}\text{C}$  and the product was collected in two

148 balloons. Participants were asked to inhale the drug from the balloons at their own pace and  
149 hold each inhalation for 8 seconds.

### 150 *Procedure*

151 Participants completed a telephone screening and then attended a screening visit to assess  
152 eligibility, drug history and complete trait questionnaires. In addition they received task training  
153 for tasks reported elsewhere (Lawn et al., 2016; Freeman et al., 2017) and a video training of  
154 the drug inhalation process. Prior to each study visit, participants were asked to abstain from  
155 drug and alcohol use for 24 hours. At the beginning of each visit, a urine test was used to verify  
156 the participant's self-reported drug use and screen for pregnancy. Then the drug was  
157 administered and 30 minutes post-administration the MRI scanning session commenced, which  
158 lasted approximately one hour. Following the MRI session, participants received a top-up  
159 administration and completed a battery of behavioural tasks (reported in Lawn et al., 2016;  
160 Mokrysz et al., 2020). Blood samples for measurement of drug concentrations in the plasma  
161 were not collected in this experiment.

### 162 *MRI acquisition*

163 A Siemens Avanto 1.5T scanner (Erlangen, Germany) using a 32-channel phased-array head-coil  
164 was used to acquire the MRI data. The resting-state functional images were acquired with a T2\*  
165 gradient-echo echo-planar imaging (EPI) sequence with (TR = 2800 ms, 32 slices, 3.2 mm  
166 isotropic voxels, TE = 43 ms, flip-angle = 90°). The scan duration was 12 minutes and 8 seconds,  
167 with a total of 260 volumes. At the beginning of the scan session, standard MPAGE  
168 (Magnetization Prepared RApid Gradient Echo) T1-weighted anatomical scans were also  
169 acquired for the purposes of co-registration of the functional images (TR = 2730 ms; TE = 3.57  
170 ms; matrix = 176 × 256 × 256; 1 mm isotropic voxels; flip angle = 7°; bandwidth = 190 Hz/pixel;  
171 parallel imaging acceleration factor = 2).

172

### 173 **Study 2**

174 Additional data from this study have been published elsewhere; these previous reports did not  
175 investigate resting-state striato-cortical connectivity (Bloomfield et al., 2020; Lawn et al., 2020).

### 176 *Study design*

177 The study used a double-blind, randomised, placebo-controlled, repeated-measures design to  
178 compare the effects of oral CBD 600mg (pure synthetic (-)-CBD) with matched placebo (PBO) in  
179 identical capsules at two sessions. Drug order was completely concealed from participants and  
180 experimenters until data collection, entry and analysis had been completed. To avoid carry-over  
181 effects the scanning sessions were separated by at least 1 week, which is more than three times  
182 the elimination half-life of THC (Hindocha et al., 2014). The order of drug was block randomised  
183 and stratified for sex. This study was conducted in accordance with Good Clinical Practice and  
184 the Helsinki Declaration (UCL Research Ethics Committee 3325/002). Participants provided  
185 written informed consent and received an honorarium for participation (£10 per hour).

### 186 *Drug administration*

187 Synthetic CBD (99.9% purity) was obtained from STI Pharmaceuticals (Brentwood, UK) and  
188 manufactured by Nova Laboratories (Leicester, UK). Size 2 gelatin capsules contained  
189 microcrystalline cellulose filler and CBD. Matched placebo capsules contained lactose filler. The  
190 CBD was formulated in 50 mg capsules. Participants swallowed all 12 capsules at their own pace  
191 under invigilation of the experimenter. The 600 mg dose was chosen as it produces an increase  
192 in plasma concentrations after acute administration (Englund et al., 2013; Babalonis et al.,  
193 2017), is well tolerated in humans (Grotenhermen, Russo & Zuardi, 2017), has been found to  
194 produce a significant anxiolytic effect (Bergamaschi et al., 2011b), and has opposing effects to  
195 THC on the striatum during fMRI (Bhattacharyya et al., 2010). Previous research suggests that  
196 CBD reaches the peak level of plasma concentration after approximately 2.5 hours (Babalonis et  
197 al., 2017).

### 198 *Participants*

199 Participants were recruited through online adverts, posters and word-of-mouth. We tested 28  
200 healthy participants. Four participants did not complete both study visits, and one additional



201 subject attended both visits but did not complete the scanning session, so their resting-state  
202 data was incomplete. These five subjects were excluded which meant 23 complete sets of data  
203 were available for analysis. Subjects ranged in age between 19 and 36 (mean=23.8, SD=4.3), all  
204 had normal BMI (mean=22.4, SD=3.6), and had sub-clinical scores on the BDI (mean=2.3,  
205 SD=2.9) and BAI (mean=2.6, SD=3.3). No participant showed any evidence of alcohol or nicotine  
206 dependence as measured by the AUDIT (mean=1.9, SD=2.1), and the FTND (mean=0, SD=0). All  
207 participants included were right-handed and aged 18–70. Exclusion criteria were: (a) current  
208 use of psychotropic agents; (b) current or past use of cannabis or CBD; (c) previous use of any  
209 psychoactive (recreational) drug on >5 occasions; (d) current or previous mood disorder,  
210 psychosis, anxiety disorder, or substance abuse disorder according to Diagnostic and Statistical  
211 Manual of Mental Disorders IV (DSM-IV) criteria; (e) current nicotine dependence (defined by  
212 Fagerström Test for Nicotine Dependence; Heatherton, Kozlowski & Fagerström, 1991); (f)  
213 score >7 on the Alcohol Use Disorders Identification Test (Saunders et al., 1993); (g) pregnancy;  
214 (h) impaired mental capacity; (i) allergy to CBD or placebo excipients; (j) claustrophobia or other  
215 contraindications to MRI.

#### 216 *Procedure*

217 Participants completed a screening on the telephone during which initial eligibility criteria (drug  
218 use, FTND, AUDIT, MRI contraindications, allergies, medical information and handedness) were  
219 assessed and basic participant details were recorded. Participants who appeared eligible on the  
220 phone were invited to attend experimental sessions. Participants were asked to fast from  
221 midnight the day before both sessions, and refrain from smoking tobacco and consuming  
222 alcohol for 24 h before the start of the sessions. Upon arrival, participants underwent urine  
223 tests to verify they were not pregnant (if female) and they had not recently taken recreational  
224 drugs. They also completed breath tests for alcohol and carbon monoxide. Eligible participants  
225 then completed two seven-hour experimental sessions, when they received CBD or placebo on  
226 the first session, and the other drug condition on the second session. The MRI scanning session  
227 commenced 2.5 hours after drug administration and lasted approximately 1.5 hours.

#### 228 *Plasma CBD concentrations*

229 We performed venipuncture immediately after MRI scanning to measure CBD concentrations.  
230 Blood samples were collected in EDTA vacutainers and were immediately centrifuged to plasma  
231 for storage at  $-80^{\circ}\text{C}$ . Samples were analysed using Gas Chromatography coupled with Mass  
232 Spectrometry with a lower limit of quantification of 0.5 ng/mL.

### 233 *MRI acquisition*

234 MRI data was collected using a 3-Tesla Siemens Prisma MRI Scanner at the Robert Steiner MR  
235 unit at Hammersmith Hospital, London. Functional imaging used a multiband (acceleration  
236 factor= 2) gradient-echo T2\*-weighted echo-planar imaging (EPI) sequence with 42 slices per  
237 volume (Repetition time [TR]=2400 ms; Time to Echo [TE]=30 ms; in-plane matrix=64×64; 3 mm  
238 isotropic voxels; flip angle=62°; bandwidth=1594 Hz/pixel; 304 volumes; a slice thickness of 3  
239 mm; field of view=192 × 192 mm). The phase encoding direction was from anterior to posterior.  
240 There were three dummy scans at the beginning of the scan, which were not included in our  
241 dataset. For structural acquisition, a T1-weighted structural volume was acquired for all  
242 participants using a MPRAGE scan (TR=2300 ms; TE=2.28 ms, TI=900 ms, flip angle=9°, field of  
243 view= 256 mm, image matrix=256 with 1 mm isotropic voxels; bandwidth=200 Hz/pixel).

### 244 **Statistical analysis (Study 1 and 2)**

245 Image analyses were performed using FSL 5.0.4. The functional data were pre-processed using  
246 spatial smoothing with a 6 mm FWHM (full-width, half-maximum) Gaussian kernel, high-pass  
247 temporal filtering (100 s), head motion correction using MCFLIRT and non-linear registration to  
248 a standard template (MNI152). The anatomical data were skull-stripped using FSL's brain  
249 extraction tool (BET) and segmented using FMRIB's automated segmentation tool (FAST), into  
250 grey/white matter and cerebro-spinal fluid (CSF).

### 251 *Striatal Networks: Seed-based analysis (Study 1 and 2)*

252 Brain masks for the three striatal networks (associative, limbic and sensorimotor) were defined  
253 according to the original definition by Martinez et al., (2003), and using the atlas provided by  
254 (Tziortzi et al., 2013). The associative mask included the precommissural dorsal caudate, the  
255 precommissural dorsal putamen and postcommissural caudate. The limbic mask included the

256 ventral pallidum and substantia nigra; and the sensorimotor mask comprised the  
257 postcommissural putamen.

258 A set of seed-based analyses were conducted using methods similar to previous reports  
259 (Demetriou et al., 2016; Cominos et al., 2018; Wall et al., 2019). The standard-space striatal  
260 brain masks were co-registered to each participant's functional image space, and time-series  
261 were extracted from these regions that were subsequently used in the first-level analysis  
262 models as regressors of interest. Additionally, the white matter and CSF time-series from each  
263 participant were included in the analysis models as regressors of no interest, along with head-  
264 motion regressors. First-level models included use of FSL's FILM algorithm to correct for auto-  
265 correlation in the time-series. Higher-level analyses were performed using FSL's FLAME-1  
266 mixed-effects model, and results were cluster-corrected for multiple comparisons at  $Z > 2.3$ ,  $p$   
267  $< .05$ . Separate group-level models were produced in order to model mean functional  
268 connectivity effects (all subjects, all scans) for each study, and voxelwise comparisons between  
269 the drug conditions (three comparisons in study 1, two in study 2). To quantify the condition  
270 effects across each striatal network, the group mean functional connectivity results were used  
271 to produce image masks (thresholded at  $Z=5$ ) from which numeric data were extracted for each  
272 subject/scan. Drug effects on mean network connectivity were assessed using 2-tailed paired  $t$   
273 tests with a corrected alpha level of  $p < 0.008$  in order to account for multiple comparisons.

274

## 275 **Results**

### 276 *Study 1*

#### 277 *Seed-based functional connectivity analyses*

278 There were no effects seen in the active drug conditions  $>$  placebo contrasts, in any of the  
279 analyses, meaning the conditions did not significantly increase connectivity relative to placebo.  
280 When administered alone, THC significantly disrupted (placebo  $>$  active conditions) mean  
281 connectivity between the limbic striatum and the bilateral insula and frontal opercular cortex as

282 shown in Figure 1. By contrast, when THC was co-administered with CBD there was no evidence  
283 for disruption of connectivity between limbic striatum and any brain region.

284

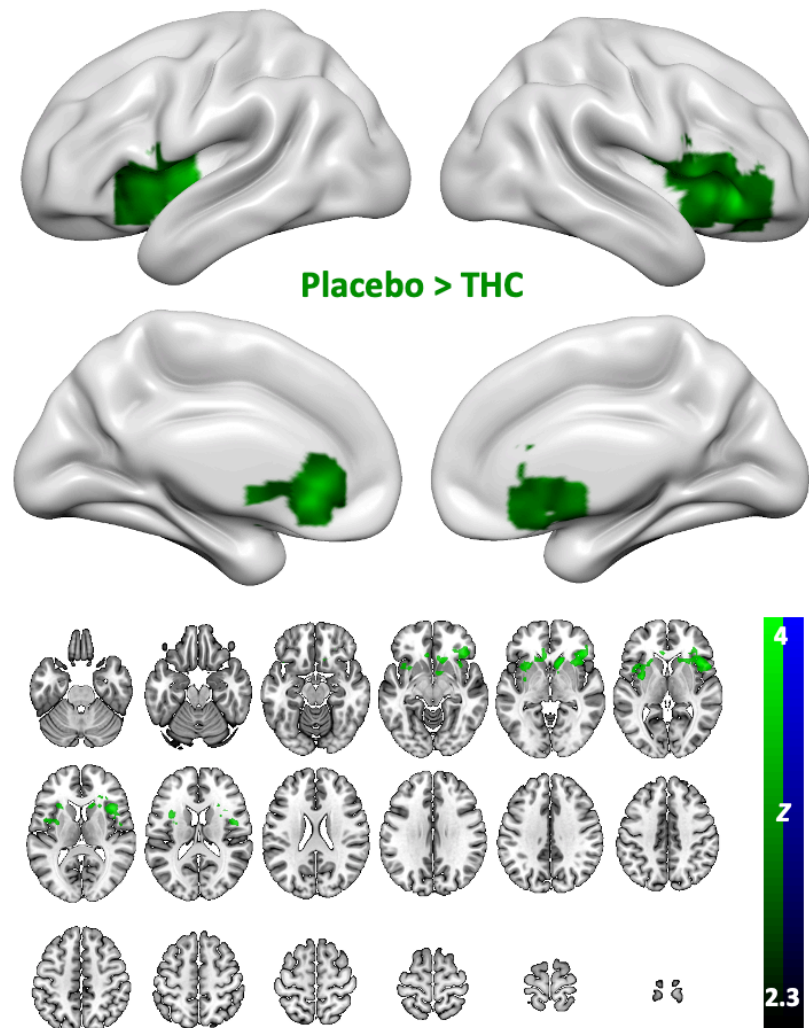

285

286 Figure 1. Drug effects on brain wide connectivity with the limbic striatum in study 1.  
287 Contrast is placebo > THC. Clusters represent a decrease in functional connectivity with  
288 the limbic striatum in the active drug condition. The THC+CBD condition showed no  
289 significant effects for this seed-region.

290 Administration of the THC+CBD condition reduced connectivity of the associative striatum with  
291 the dorsal anterior cingulate as well as a large lateral region covering part of frontal opercular  
292 cortex and sensorimotor regions in the left hemisphere (more restricted in the right  
293 hemisphere). The THC condition showed a broadly similar, though somewhat more widespread  
294 distribution, with the regions affected covering more of the frontal operculum and extending  
295 downwards into the insula. See Figure 2.

296

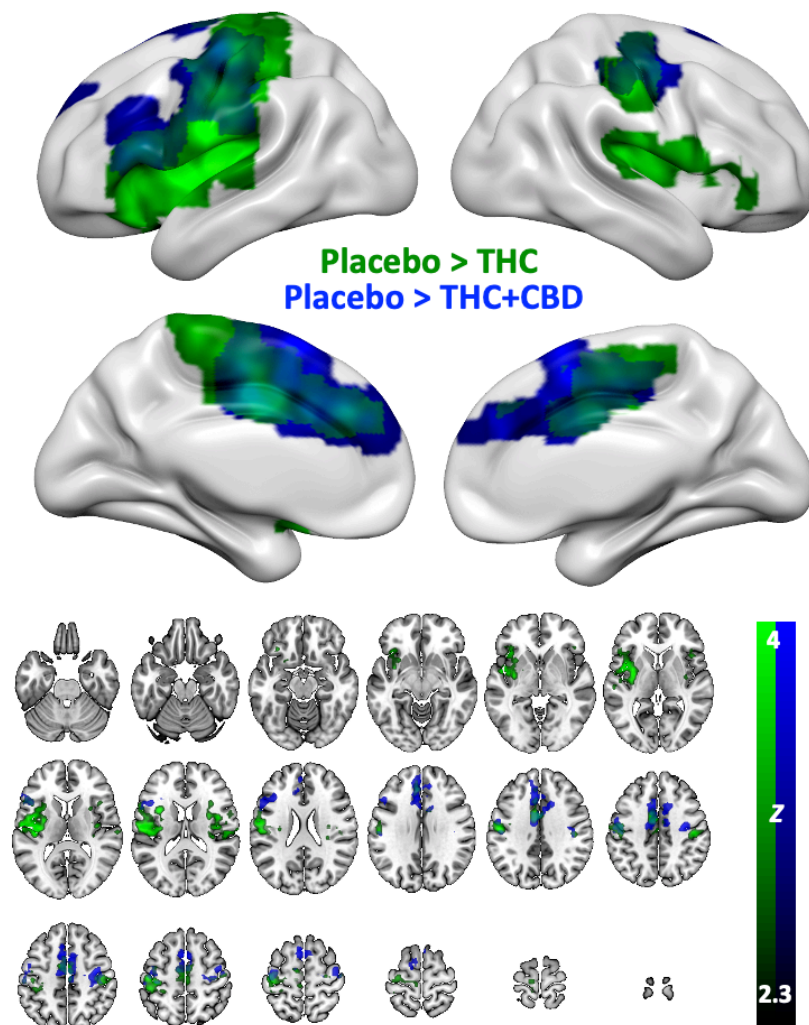

297

298 Figure 2. Drug effects on brain wide connectivity with the associative striatum in study  
299 1. Contrasts are placebo > active drug. Clusters represent a decrease in functional

300 connectivity with the associative striatum in the active drug conditions. The green scale  
301 shows the THC condition and the blue scale shows THC+CBD.

302 Connectivity with the sensorimotor striatum was the most strongly disrupted of the striatal  
303 networks in this study. The THC+CBD condition reduced activity within many sensory-motor  
304 associated areas such as the parietal operculum cortex, central opercular cortex and the post  
305 central gyrus. Language and auditory associated areas also had reduced connectivity including  
306 the supramarginal gyrus, planum temporale and Heschl's gyrus. There was also some reduction  
307 seen in the motor cortex. Similar disruptions were seen in the THC condition, the most notable  
308 differences are larger portion of Heschl's gyrus disrupted as well as secondary somatosensory  
309 cortex.

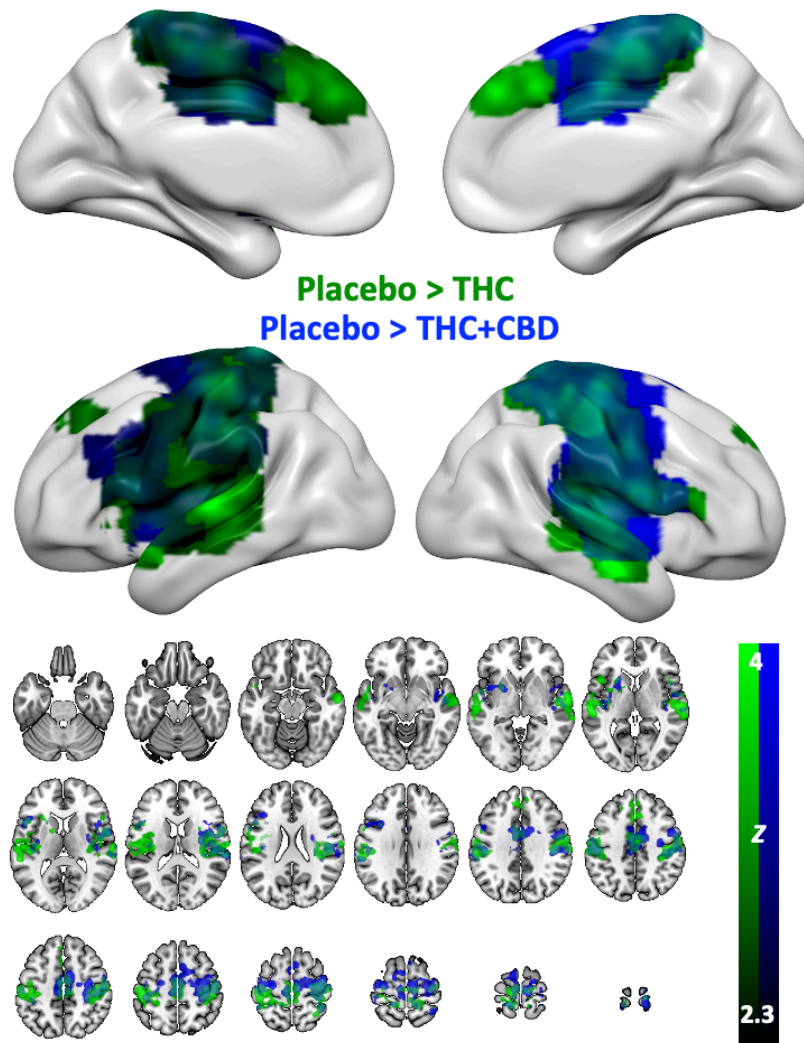

310

311

312

313

314

Figure 3. Drug effects on brain wide connectivity with the sensorimotor striatum in study 1. Contrasts are placebo > active drug. Clusters represent a decrease in functional connectivity with the sensorimotor striatum in the active drug conditions. The green scale shows the THC condition and the blue scale shows THC+CBD.

315

316

317

318

The overall mean connectivity of each network was also examined using thresholded versions of the group-mean connectivity maps as mask images. The largest effect of the active conditions (relative to placebo) was in the sensorimotor network (THC+CBD:  $t[16] = 2.93$ ,  $p = .01$ ; THC:  $t[16] = 3.07$ ,  $p = .007$ ).

319

320 *Study 2*

321 Results from Study 2 showed a markedly different effect of oral CBD on striatal functional  
322 connectivity. Figure 5 shows results from all three analyses (using associative, limbic, and  
323 sensorimotor subdivisions as seed regions) and for the CBD condition vs. placebo. Connectivity  
324 analyses with the associative sub-division showed drug effects in bilateral areas in the posterior  
325 parietal lobes, extending medially into the parieto-occipital sulcus and into the posterior  
326 cingulate in the left hemisphere. It is important to note that this result is the opposite contrast  
327 to the results found in study 1 (and in fact, the other two results described below from study 2),  
328 and is in fact CBD > placebo, implying a relative *increase* in functional connectivity between  
329 these regions and the associative striatum, under the CBD condition. No areas showing  
330 significant relative decreases (placebo > CBD) were found in this analysis. For the limbic  
331 striatum seed-region, an area of decreased connectivity (placebo > CBD) was found in the right  
332 hemisphere insula and lateral frontal cortex. For the sensorimotor seed region, significant  
333 clusters of relatively decreased connectivity (placebo > CBD) were seen in the left cerebellum.  
334 For these latter two analyses, no areas showing significant relative increases (CBD > placebo)  
335 were found.



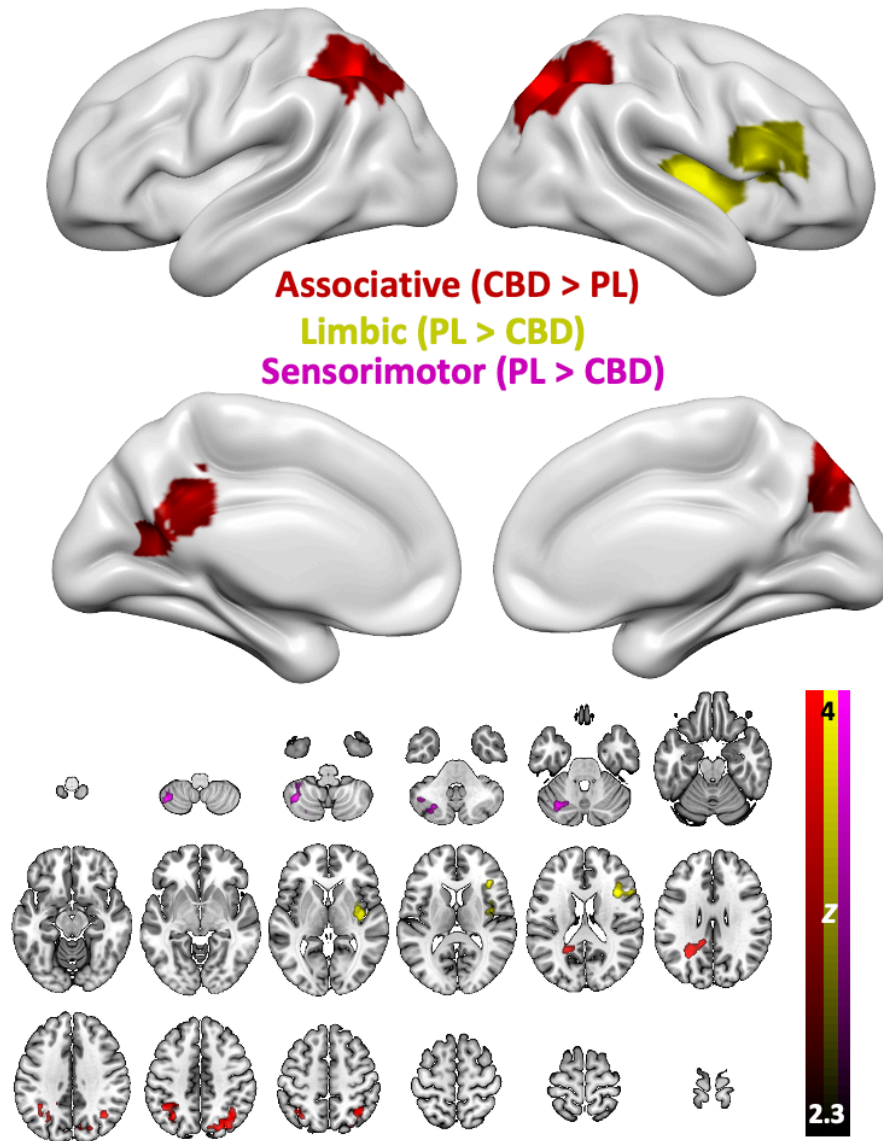

336

337

338

339

340

341

342

343

Figure 5. Drug effects on brain wide connectivity with the associative (red), limbic (yellow), and sensorimotor (pink) striatum in study 2. Both relative increases (CBD > PL) and decreases (PL > CBD) are shown, depending on the pattern of significant results in the three analyses. Effects on sensorimotor striatum connectivity were only seen in the cerebellum, and are therefore not visible on the top panel, which only shows inflated views of the cortex.

## 344 Discussion

345 The present data demonstrate extensive effects of cannabinoids on striatal functional  
346 connectivity networks. In study 1, effects on the limbic striatum were specific to the THC  
347 condition, with disruptions (relative decreases in connectivity with the active drug condition)  
348 seen in the anterior insula, and areas of the striatum itself. Effects of the different drug  
349 conditions on associative striatal connectivity were both widespread, and somewhat  
350 dissociated, with both strains disrupting dorsal regions (ACC and motor cortex) but the THC  
351 condition also specifically affecting more ventral regions (frontal operculum and insula).  
352 Regions affected in the sensorimotor striatum analysis were somewhat similar, with perhaps  
353 less of a dorsal/ventral dissociation between the two conditions. In study 2, the effect of 600mg  
354 CBD is noticeably weaker and less widespread, with disruption of connectivity in the analyses of  
355 limbic and sensorimotor seed-regions only seen in localised regions in one hemisphere (the  
356 insula/lateral frontal lobe, and the cerebellum, respectively). Intriguingly, the analysis of the  
357 associative striatum connectivity in study 2 showed a result of opposite polarity; a relative  
358 increase, or enhancement of connectivity, in parietal regions as a result of the drug  
359 administration.

360 Overall, it is clear cannabinoids can have profoundly disruptive effects on striatal functional  
361 connectivity, but the effects of CBD alone are relatively minor, and the effects of THC are  
362 effectively blocked by the presence of CBD in the limbic striatum. Even in the associative and  
363 sensorimotor striatum, effects of the THC-only condition (THC) in study 1 are more widespread,  
364 also suggesting that CBD is moderating the effect of THC in these networks to some extent. The  
365 finding in study 2 that CBD actually increases associative striatum connectivity is consistent with  
366 the result in study 1 of an ameliorating effect of the CBD on the disruptive effects of THC in the  
367 associative striatum, when administered together. The specific effect of the pure-THC (THC)  
368 condition on the limbic striatum here is mirrored by a key previous result (Bossong et al., 2015)  
369 which showed that only the limbic striatum showed reliable dopamine release with a THC  
370 challenge, indexed by [<sup>11</sup>C]raclopride Positron Emission Tomography (PET). This study used  
371 synthetic (therefore, pure) THC as the acute challenge; the present data therefore extend this

372 result by suggesting that CBD may potentially block the release of dopamine produced by THC  
373 in the limbic striatum. CBD alone may also have effects on limbic striatum connectivity, as seen  
374 in study 2, where the (right) insula is also significantly modulated by the oral CBD condition.

375 This may be significant, as the limbic striatum consists of the nucleus accumbens and the head  
376 of the caudate. The nucleus accumbens is one of the primary substrates known to be heavily  
377 involved in the formation and maintenance of addiction (Robinson & Berridge, 1993, 2001;  
378 Robbins & Everitt, 2002; Volkow et al., 2007). The increasing concentration of THC in modern  
379 cannabis (which also often has relatively low-levels of CBD; Niesink et al., 2015; El Sohly et al.,  
380 2016) is thought to be a major factor in the increase of cannabis related-health issues, in  
381 particular addiction (Freeman & Winstock, 2015). The finding here that CBD blocks the  
382 disruptive effect on limbic striatum connectivity is also consistent with previous behavioural  
383 work showing that CBD attenuates the appetitive and incentive-salience effects of THC and  
384 other drugs (Morgan et al., 2010; Hindocha et al., 2018). Taken together these various findings  
385 suggest a possible physiological mechanism whereby THC promotes dopamine release in the  
386 ventral striatum, making users who consume relatively pure THC strains vulnerable to  
387 addiction. However, in users of more balanced strains containing CBD, the acute dopaminergic  
388 and addiction-promoting effects of THC on the ventral striatum are ameliorated, or perhaps  
389 blocked entirely. This 'buffering' effect of CBD is also consistent with the previous results  
390 reported from this cohort (Lawn et al., 2016; Freeman et al., 2017; Wall et al., 2019).

391 The finding of a relative increase in connectivity with the CBD condition (in the associative  
392 striatum analysis) is mirrored by a recent similar finding in Grimm et al. (2018), which also used  
393 oral administration and the same dose as the present data (600mg). These authors showed a  
394 relative increase in frontal-striatal connectivity with CBD, and speculate that this might account  
395 for the anti-psychotic effects of CBD, as fronto-striatal connectivity effects are a common  
396 finding in studies of schizophrenic patients (e.g. Fornito et al., 2013). Another converging result  
397 is that of Rzepa, Tudge & McCabe (2016) which used the CB1 neutral antagonist  
398 tetrahydrocannabivarin (THCV). This study showed increased connectivity within the executive  
399 control network; usually conceived as a network subserving attentional and cognitive processes

400 involved in task engagement. Cannabidiol also may be a negative allosteric modulator at CB1  
401 receptors (Laprairie et al., 2015; Chesney et al., 2020), and here we show increases in  
402 connectivity in the associative striatum; the region of the striatum most associated with  
403 cognitive functions and brain regions.

404 We also see marked effects on the insula, across all three networks examined in study 1, and  
405 for the limbic striatum network in study 2. The insula is a key hub in the salience network  
406 (Seeley et al., 2007; Goulden et al., 2014; Uddin, 2014) and recent work using combined PET  
407 and fMRI methods has identified a link between mesolimbic dopamine systems and the  
408 salience network (McCutcheon et al., 2019b). Connectivity between the striatum and the  
409 salience network has also been shown to be affected in psychotic disorders (Karcher, Rogers &  
410 Woodward, 2019), and striatal-salience network connectivity has been shown to be increased  
411 in individuals exposed to chronic psychosocial stressors (a key hypothesised factor in the  
412 development of psychosis; McCutcheon et al., 2019a). Taken together, these findings suggest a  
413 clear role for striatal-salience network connectivity in the pathophysiology of psychotic  
414 disorders, and further suggest that compounds that specifically target these systems (such as  
415 CBD) may be useful therapeutically.

416 To the authors' knowledge, this is the first report in human subjects of a comparison of THC,  
417 THC+CBD and CBD, achieved using a unified set of analysis methods, and with all comparisons  
418 performed in a placebo-controlled, double-blind design. These are important strengths,  
419 however, as the data come from two separate studies a direct comparison between each of the  
420 conditions is compromised by the use of different cohorts of subjects, and different routes of  
421 administration (inhalation in study 1, oral dosing in study 2) and doses. Other differences  
422 between studies were scanner model and field strength (1.5 Tesla in study 1, 3 Tesla in study 2),  
423 data acquisition protocol, and length of the scan.

#### 424 **Conclusion**

425 Cannabinoids exert a major acute effect on striato-cortical functional connectivity, with effects  
426 on striatal connectivity with the insula particularly evident across all three drug conditions.  
427 These effects on the limbic striatum in particular and its connectivity with the insula (and by

428 implication, the salience network) are likely a crucial finding in our evolving understanding of  
429 the acute brain effects of cannabinoids. A key question for future research is understanding  
430 how these acute effects translate into longer-term effects in chronic users, what role these  
431 striato-cortical connections may have in the pathophysiology of cannabis use disorder and  
432 cannabis-related psychosis, and what therapeutic options might usefully target them. These  
433 questions will grow increasingly more urgent as cannabis seems likely to continue its transition  
434 to quasi-legal or fully-legal status in a growing number of jurisdictions.

## 435 **References**

- 436 Babalonis S., Haney M., Malcolm RJ., Lofwall MR., Votaw VR., Sparenborg S., Walsh SL. 2017.  
437 Oral cannabidiol does not produce a signal for abuse liability in frequent marijuana  
438 smokers. *Drug and Alcohol Dependence* 172:9–13. DOI: 10.1016/j.drugalcdep.2016.11.030.
- 439 Bergamaschi MM., Queiroz RHC., Chagas MHN., de Oliveira DCG., De Martinis BS., Kapczinski F.,  
440 Quevedo J., Roesler R., Schröder N., Nardi AE., Martín-Santos R., Hallak JEC., Zuardi AW.,  
441 Crippa JAS. 2011a. Cannabidiol Reduces the Anxiety Induced by Simulated Public Speaking  
442 in Treatment-Naïve Social Phobia Patients. *Neuropsychopharmacology* 36:1219–1226. DOI:  
443 10.1038/npp.2011.6.
- 444 Bergamaschi MM., Queiroz RHC., Chagas MHN., De Oliveira DCG., De Martinis BS., Kapczinski F.,  
445 Quevedo J., Roesler R., Schröder N., Nardi AE., Martín-Santos R., Hallak JEC., Zuardi AW.,  
446 Crippa JAS. 2011b. Cannabidiol reduces the anxiety induced by simulated public speaking  
447 in treatment-naive social phobia patients. *Neuropsychopharmacology* 36:1219–1226. DOI:  
448 10.1038/npp.2011.6.
- 449 Bhattacharyya S., Morrison PD., Fusar-Poli P., Martin-Santos R., Borgwardt S., Winton-Brown T.,  
450 Nosarti C., O' Carroll CM., Seal M., Allen P., Mehta MA., Stone JM., Tunstall N., Giampietro  
451 V., Kapur S., Murray RM., Zuardi AW., Crippa JA., Atakan Z., McGuire PK. 2010. Opposite  
452 Effects of  $\Delta$ -9-Tetrahydrocannabinol and Cannabidiol on Human Brain Function and  
453 Psychopathology. *Neuropsychopharmacology* 35:764–774. DOI: 10.1038/npp.2009.184.
- 454 Bloomfield MAP., Green SF., Hindocha C., Yamamori Y., Yim JLL., Jones APM., Walker HR.,  
455 Tokarczuk P., Statton B., Howes OD., Curran HV., Freeman TP. 2020. The effects of acute  
456 cannabidiol on cerebral blood flow and its relationship to memory: An arterial spin  
457 labelling magnetic resonance imaging study. *Journal of Psychopharmacology* 34:981–989.  
458 DOI: 10.1177/0269881120936419.
- 459 Bloomfield MAP., Hindocha C., Green SF., Wall MB., Lees R., Petrilli K., Costello H., Ogunbiyi  
460 MO., Bossong MG., Freeman TP. 2018. The neuropsychopharmacology of cannabis: a  
461 review of human imaging studies. *Pharmacology and Therapeutics*. DOI:

- 462 S0163725818301906.
- 463 Bloomfield MAP., Morgan CJA., Egerton A., Kapur S., Curran HV., Howes OD. 2014.  
464 Dopaminergic function in cannabis users and its relationship to cannabis-induced psychotic  
465 symptoms. *Biological Psychiatry* 75:470–478. DOI: 10.1016/j.biopsych.2013.05.027.
- 466 Bossong MG., Van Berckel BNM., Boellaard R., Zuurman L., Schuit RC., Windhorst AD., Van  
467 Gerven JMA., Ramsey NF., Lammertsma AA., Kahn RS. 2009.  $\Delta$ 9-Tetrahydrocannabinol  
468 Induces Dopamine Release in the Human Striatum. *Neuropsychopharmacology* 34:759–  
469 766. DOI: 10.1038/npp.2008.138.
- 470 Bossong MG., Mehta MA., Van Berckel BNM., Howes OD., Kahn RS., Stokes PRA. 2015. Further  
471 human evidence for striatal dopamine release induced by administration of  $\delta$ 9-  
472 tetrahydrocannabinol (THC): Selectivity to limbic striatum. *Psychopharmacology*  
473 232:2723–2729. DOI: 10.1007/s00213-015-3915-0.
- 474 Chesney E., McGuire P., Freeman TP., Strang J., Englund A. 2020. Lack of evidence for the  
475 effectiveness or safety of over-the-counter cannabidiol products. *Therapeutic Advances in*  
476 *Psychopharmacology* 10:204512532095499. DOI: 10.1177/2045125320954992.
- 477 Comninos AN., Demetriou L., Wall MB., Shah AJ., Clarke SA., Narayanaswamy S., Nesbitt A., Izzi-  
478 engbeaya C., Prague JK., Abbara A., Ratnasabapathy R., Yang L., Salem V., Nijher GM.,  
479 Jayasena CN., Tanner M., Bassett P., Mehta A., Mcgonigle J., Rabiner EA., Bloom SR., Dhillon  
480 WS. 2018. Modulations of human resting brain connectivity by kisspeptin enhance sexual  
481 and emotional functions. *JCI Insight* 3:0–10.
- 482 Curran V., Brignell C., Fletcher S., Middleton P., Henry J. 2002. Cognitive and subjective dose-  
483 response effects of acute oral  $\Delta$ 9 -tetrahydrocannabinol (THC) in infrequent cannabis  
484 users. *Psychopharmacology* 164:61–70. DOI: 10.1007/s00213-002-1169-0.
- 485 Curran H V., Freeman, T P., Mokrysz C., Lewis D A., Morgan, C, J A., Parsons LH. 2016. Keep off  
486 the grass? Cannabis, cognition and addiction. *Nature Reviews Neuroscience* 17:293–306.  
487 DOI: 10.1038/nrn.2016.28.

- 488 D'Souza DC., Perry E., MacDougall L., Ammerman Y., Cooper T., Wu Y., Braley G., Gueorguieva  
489 R., Krystal JH. 2004. The Psychotomimetic Effects of Intravenous Delta-9-  
490 Tetrahydrocannabinol in Healthy Individuals: Implications for Psychosis.  
491 *Neuropsychopharmacology* 29:1558–1572. DOI: 10.1038/sj.npp.1300496.
- 492 Demetriou L., Kowalczyk OS., Tyson G., Bello T., Newbould RD., Wall MB. 2016. A  
493 comprehensive evaluation of multiband-accelerated sequences and their effects on  
494 statistical outcome measures in fMRI. *bioRxiv*:1–26. DOI: 10.1101/076307.
- 495 Englund A., Morrison PD., Nottage J., Hague D., Kane F., Bonaccorso S., Stone JM., Reichenberg  
496 A., Brenneisen R., Holt D., Feilding A., Walker L., Murray RM., Kapur S. 2013. Cannabidiol  
497 inhibits THC-elicited paranoid symptoms and hippocampal-dependent memory  
498 impairment. *Journal of Psychopharmacology* 27:19–27. DOI: 10.1177/0269881112460109.
- 499 Everitt BJ., Robbins TW. 2013. From the ventral to the dorsal striatum: Devolving views of their  
500 roles in drug addiction. *Neuroscience and Biobehavioral Reviews* 37:1946–1954. DOI:  
501 10.1016/j.neubiorev.2013.02.010.
- 502 Fornito A., Harrison BJ., Goodby E., Dean A., Ooi C., Nathan PJ., Lennox BR., Jones PB., Suckling  
503 J., Bullmore ET. 2013. Functional dysconnectivity of corticostriatal circuitry as a risk  
504 phenotype for psychosis. *JAMA Psychiatry* 70:1143–1151. DOI:  
505 10.1001/jamapsychiatry.2013.1976.
- 506 Freeman TP., Hindocha C., Baio G., Shaban NDC., Thomas EM., Astbury D., Freeman AM., Lees  
507 R., Craft S., Morrison PD., Bloomfield MAP., O'Ryan D., Kinghorn J., Morgan CJA., Mofeez  
508 A., Curran HV. 2020. Cannabidiol for the treatment of cannabis use disorder: a phase 2a,  
509 double-blind, placebo-controlled, randomised, adaptive Bayesian trial. *The Lancet*  
510 *Psychiatry* 7:865–874. DOI: 10.1016/S2215-0366(20)30290-X.
- 511 Freeman TP., Hindocha C., Green SF., Bloomfield MAP. 2019a. Medicinal use of cannabis based  
512 products and cannabinoids. *BMJ (Online)* 365:1–7. DOI: 10.1136/bmj.l1141.
- 513 Freeman TP., Lorenzetti V. 2020. 'Standard THC units': a proposal to standardize dose across all



- 514 cannabis products and methods of administration. *Addiction* 115:1207–1216. DOI:  
515 10.1111/add.14842.
- 516 Freeman AM., Petrilli K., Lees R., Hindocha C., Mokrysz C., Curran HV., Saunders R., Freeman TP.  
517 2019b. How does cannabidiol (CBD) influence the acute effects of delta-9-  
518 tetrahydrocannabinol (THC) in humans? A systematic review. *Neuroscience and*  
519 *Biobehavioral Reviews* 107:696–712. DOI: 10.1016/j.neubiorev.2019.09.036.
- 520 Freeman TP., Pope RA., Wall MB., Bisby JA., Luijten M., Hindocha C., Mokrysz C., Lawn W.,  
521 Bloomfield MAP., Morgan CJA., Nutt DJ., Curran V. 2017. Cannabis dampens the effects of  
522 music in brain regions sensitive to reward and emotion. *International Journal of*  
523 *Neuropsychopharmacology*. DOI: 10.1093/ijnp/pyx082/4102982/Cannabis-dampens-the-  
524 effects-of-music-in-brain.
- 525 Freeman TP., Winstock AR. 2015. Examining the profile of high-potency cannabis and its  
526 association with severity of cannabis dependence. *Psychological Medicine* 45:3181–3189.  
527 DOI: 10.1017/S0033291715001178.
- 528 Van De Giessen E., Weinstein JJ., Cassidy CM., Haney M., Dong Z., Ghazzaoui R., Ojeil N., Kegeles  
529 LS., Xu X., Vadhan NP., Volkow ND., Slifstein M., Abi-Dargham A. 2017. Deficits in striatal  
530 dopamine release in cannabis dependence. *Molecular Psychiatry* 22:68–75. DOI:  
531 10.1038/mp.2016.21.
- 532 Glass M., Dragunow M., Faull RLM. 1997. Cannabinoid receptors in the human brain: A detailed  
533 anatomical and quantitative autoradiographic study in the fetal, neonatal and adult human  
534 brain. *Neuroscience* 77:299–318. DOI: 10.1016/S0306-4522(96)00428-9.
- 535 Goulden N., Khusnulina A., Davis NJ., Bracewell RM., Bokde AL., McNulty JP., Mullins PG. 2014.  
536 The salience network is responsible for switching between the default mode network and  
537 the central executive network: replication from DCM. *NeuroImage* 99:180–90. DOI:  
538 10.1016/j.neuroimage.2014.05.052.
- 539 Grotenhermen F., Russo E., Zuardi AW. 2017. Even High Doses of Oral Cannabidiol Do Not

- 540 Cause THC-Like Effects in Humans: Comment on Merrick et al. *Cannabis and Cannabinoid*  
541 *Research* 2016;1(1):102-112; DOI: 10.1089/can.2015.0004. *Cannabis and Cannabinoid*  
542 *Research* 2:1–4. DOI: 10.1089/can.2016.0036.
- 543 Gunasekera B., Davies C., Martin-Santos R., Bhatthacharyya S. 2020. The Yin and Yang of  
544 Cannabis - a systematic review of human neuroimaging evidence of the differential effects  
545 of delta-9-tetrahydrocannabinol and cannabidiol. *Biological Psychiatry: Cognitive*  
546 *Neuroscience and Neuroimaging*. DOI: <https://doi.org/10.1016/j.bpsc.2020.10.007>.
- 547 Hanuš LO., Meyer SM., Muñoz E., Tagliatela-Scafati O., Appendino G. 2016.  
548 *Phytocannabinoids: A unified critical inventory*. DOI: 10.1039/c6np00074f.
- 549 Hasin DS., Sarvet AL., Cerdá M., Keyes KM., Stohl M., Galea S., Wall MM. 2017. US adult illicit  
550 cannabis use, cannabis use disorder, and medical marijuana laws: 1991-1992 to 2012-  
551 2013. *JAMA Psychiatry* 74:579–588. DOI: 10.1001/jamapsychiatry.2017.0724.
- 552 Heatherton, TF, Kozlowski LT FK. 1991. The Fagerstrom test for nicotine dependence. *British*  
553 *Journal of Addiction* 86:1119–1127.
- 554 Hindocha C., Freeman TP., Grabski M., Stroud JB., Crudgington H., Davies AC., Das RK., Lawn W.,  
555 Morgan CJA., Curran HV. 2018. Cannabidiol reverses attentional bias to cigarette cues in a  
556 human experimental model of tobacco withdrawal. *Addiction* 113:1696–1705. DOI:  
557 10.1111/add.14243.
- 558 Hindocha C., Freeman TP., Schafer G., Gardener C., Das RK., Morgan CJA., Curran HV. 2015.  
559 Acute effects of delta-9-tetrahydrocannabinol, cannabidiol and their combination on facial  
560 emotion recognition: A randomised, double-blind, placebo-controlled study in cannabis  
561 users. *European Neuropsychopharmacology* 25:325–334. DOI:  
562 10.1016/j.euroneuro.2014.11.014.
- 563 Hindocha C., Wollenberg O., Carter Leno V., Alvarez BO., Curran HV., Freeman TP. 2014.  
564 Emotional processing deficits in chronic cannabis use: A replication and extension. *Journal*  
565 *of Psychopharmacology* 28:466–471. DOI: 10.1177/0269881114527359.

- 566 Howes O., Bose S., Turkheimer F., Valli I., Egerton A., Stahl D., Valmaggia L., Allen P., Murray R.,  
567 McGuire P. 2011. Progressive increase in striatal dopamine synthesis capacity as patients  
568 develop psychosis: A PET study. *Molecular Psychiatry* 16:885–888. DOI:  
569 10.1038/mp.2011.20.
- 570 Hurd YL., Spriggs S., Alishayev J., Winkel G., Gurgov K., Kudrich C., Oprescu AM., Salsitz E. 2019.  
571 Cannabidiol for the reduction of cue-induced craving and anxiety in drug-abstinent  
572 individuals with heroin use disorder: A double-blind randomized placebo-controlled trial.  
573 *American Journal of Psychiatry* 176:911–922. DOI: 10.1176/appi.ajp.2019.18101191.
- 574 Karcher NR., Rogers BP., Woodward ND. 2019. Functional Connectivity of the Striatum in  
575 Schizophrenia and Psychotic Bipolar Disorder. *Biological Psychiatry: Cognitive  
576 Neuroscience and Neuroimaging* 4:956–965. DOI: 10.1016/j.bpsc.2019.05.017.
- 577 Laprairie RB., Bagher AM., Kelly MEM., Denovan-Wright EM. 2015. Cannabidiol is a negative  
578 allosteric modulator of the cannabinoid CB1 receptor. *British Journal of Pharmacology*  
579 172:4790–4805. DOI: 10.1111/bph.13250.
- 580 Lawn W., Freeman TP., Pope RA., Joye A., Harvey L., Hindocha C., Mokrysz C., Moss A., Wall  
581 MB., Bloomfield MA., Das RK., Morgan CJ., Nutt DJ., Curran HV. 2016. Acute and chronic  
582 effects of cannabinoids on effort-related decision-making and reward learning: an  
583 evaluation of the cannabis ‘amotivational’ hypotheses. *Psychopharmacology*. DOI:  
584 10.1007/s00213-016-4383-x.
- 585 Lawn W., Hill J., Hindocha C., Yim J., Yamamori Y., Jones G., Walker H., Green SF., Wall MB.,  
586 Howes OD., Curran HV., Freeman TP. 2020. The acute effects of cannabidiol on the neural  
587 correlates of reward anticipation and feedback in healthy volunteers. DOI:  
588 10.1177/0269881120944148.
- 589 Leung L. 2011. Cannabis and its derivatives: Review of medical use. *Journal of the American  
590 Board of Family Medicine* 24:452–462. DOI: 10.3122/jabfm.2011.04.100280.
- 591 Leweke FM., Piomelli D., Pahlisch F., Muhl D., Gerth CW., Hoyer C., Klosterkötter J., Hellmich

- 592 M., Koethe D. 2012. Cannabidiol enhances anandamide signaling and alleviates psychotic  
593 symptoms of schizophrenia. *Translational Psychiatry* 2:e94. DOI: 10.1038/tp.2012.15.
- 594 Lucas P., Walsh Z. 2017. Medical cannabis access, use, and substitution for prescription opioids  
595 and other substances: A survey of authorized medical cannabis patients. *International*  
596 *Journal of Drug Policy* 42:30–35. DOI: 10.1016/j.drugpo.2017.01.011.
- 597 Martinez D., Slifstein M., Broft A., Mawlawi O., Chatterjee R., Hwang D., Huang Y., Cooper T.,  
598 Kegeles L., Zarahn E., Abi-Dargham A., Haber SN., Laruelle M. 2003. Imaging Human  
599 Mesolimbic Dopamine Transmission With Positron Emission Tomography. Part II:  
600 Amphetamine-Induced Dopamine Release in the Functional Subdivisions of the Striatum.  
601 *Journal of cerebral blood flow and metabolism* 23:285–300. DOI:  
602 10.1097/01.WCB.0000048520.34839.1A.
- 603 McCutcheon RA., Bloomfield MAP., Dahoun T., Mehta M., Howes OD. 2019a. Chronic  
604 psychosocial stressors are associated with alterations in salience processing and  
605 corticostriatal connectivity. *Schizophrenia Research* 213:56–64. DOI:  
606 10.1016/j.schres.2018.12.011.
- 607 McCutcheon RA., Nour MM., Dahoun T., Jauhar S., Pepper F., Expert P., Veronese M., Adams  
608 RA., Turkheimer F., Mehta MA., Howes OD. 2019b. Mesolimbic Dopamine Function Is  
609 Related to Salience Network Connectivity: An Integrative Positron Emission Tomography  
610 and Magnetic Resonance Study. *Biological Psychiatry* 85:368–378. DOI:  
611 10.1016/j.biopsych.2018.09.010.
- 612 McGuire P., Robson P., Cubala WJ., Vasile D., Morrison PD., Barron R., Taylor A., Wright S. 2018.  
613 Cannabidiol (CBD) as an adjunctive therapy in schizophrenia: A multicenter randomized  
614 controlled trial. *American Journal of Psychiatry* 175:225–231. DOI:  
615 10.1176/appi.ajp.2017.17030325.
- 616 Mokrysz C., Freeman TP., Korkki S., Griffiths K., Curran H V. 2016. Are adolescents more  
617 vulnerable to the harmful effects of cannabis than adults? A placebo-controlled study in  
618 human males. *Translational psychiatry* 6:e961. DOI: 10.1038/tp.2016.225.

- 619 Mokrysz C., Shaban NDC., Freeman TP., Lawn W., Pope RA., Hindocha C., Freeman A., Wall MB.,  
620 Bloomfield MAP., Morgan CJA., Nutt DJ., Curran V. 2020. Acute effects of cannabis on  
621 speech illusions and psychotic-like symptoms : two studies testing the moderating effects  
622 of cannabidiol and adolescence. *Psychological Medicine*.
- 623 Morgan CJA., Freeman TP., Schafer GL., Curran HV. 2010. Cannabidiol attenuates the appetitive  
624 effects of  $\Delta^9$ - tetrahydrocannabinol in humans smoking their chosen cannabis.  
625 *Neuropsychopharmacology* 35:1879–1885. DOI: 10.1038/npp.2010.58.
- 626 Niesink RJM., Rigtter S., Koeter MW., Brunt TM. 2015. Potency trends of  $\Delta^9$ -  
627 tetrahydrocannabinol, cannabidiol and cannabinol in cannabis in the Netherlands: 2005-  
628 15. *Addiction* 110:1941–1950. DOI: 10.1111/add.13082.
- 629 Pertwee RG. 2008. The diverse CB<sub>1</sub> and CB<sub>2</sub> receptor pharmacology of three plant  
630 cannabinoids:  $\Delta^9$ -tetrahydrocannabinol, cannabidiol and  $\Delta^9$ -tetrahydrocannabivarin.  
631 *British Journal of Pharmacology* 153:199–215. DOI: 10.1038/sj.bjp.0707442.
- 632 Robbins TW., Everitt BJ. 2002. Limbic-striatal memory systems and drug addiction.  
633 *Neurobiology of Learning and Memory* 78:625–636. DOI: 10.1006/nlme.2002.4103.
- 634 Robinson T., Berridge K. 1993. The neural basis of drug craving: an incentive-sensitization  
635 theory of addiction. *Brain research reviews* 8:247–291.
- 636 Robinson TE., Berridge KC. 2001. Incentive-sensitization and addiction. *Addiction* 96:103–14.  
637 DOI: 10.1080/09652140020016996.
- 638 Rzepa E., Tudge L., McCabe C. 2016. The CB<sub>1</sub> neutral antagonist tetrahydrocannabivarin  
639 reduces default mode network and increases executive control network resting state  
640 functional connectivity in healthy volunteers. *International Journal of*  
641 *Neuropsychopharmacology* 19:1–7. DOI: 10.1093/ijnp/pyv092.
- 642 Saunders JB., Aasland OG., Babor TF., De La Fuente JR., Grant M. 1993. Development of the  
643 Alcohol Use Disorders Identification Test (AUDIT): WHO Collaborative Project on Early  
644 Detection of Persons with Harmful Alcohol Consumption-II. *Addiction* 88:791–804. DOI:

- 645 10.1111/j.1360-0443.1993.tb02093.x.
- 646 Seeley WW., Menon V., Schatzberg AF., Keller J., Glover GH., Kenna H., Reiss AL., Greicius MD.  
647 2007. Dissociable intrinsic connectivity networks for salience processing and executive  
648 control. *The Journal of neuroscience : the official journal of the Society for Neuroscience*  
649 27:2349–56. DOI: 10.1523/JNEUROSCI.5587-06.2007.
- 650 El Sohly MA., Mehmedic Z., Foster S., Gon C., Chandra S., Church JC. 2016. Changes in cannabis  
651 potency over the last 2 decades (1995-2014): Analysis of current data in the United States.  
652 *Biological Psychiatry* 79:613–619. DOI: 10.1016/j.biopsych.2016.01.004.
- 653 Tomasi D., Wang GJ., Volkow ND. 2015. Balanced modulation of striatal activation from D2/D3  
654 receptors in caudate and ventral striatum: Disruption in cannabis abusers. *Human Brain*  
655 *Mapping* 36:3154–3166. DOI: 10.1002/hbm.22834.
- 656 Tziortzi AC., Haber SN., Searle GE., Tsoumpas C., Long CJ., Shotbolt P., Douaud G., Jbabdi S.,  
657 Behrens TEJ., Rabiner E a., Jenkinson M., Gunn RN. 2013. Connectivity-Based Functional  
658 Analysis of Dopamine Release in the Striatum Using Diffusion-Weighted MRI and Positron  
659 Emission Tomography. *Cerebral cortex (New York, N.Y. : 1991)*. DOI:  
660 10.1093/cercor/bhs397.
- 661 Uddin LQ. 2014. Salience processing and insular cortical function and dysfunction. *Nature*  
662 *Reviews Neuroscience* 16:55–61. DOI: 10.1038/nrn3857.
- 663 Volkow ND., Fowler JS., Wang G-J., Swanson JM., Telang F. 2007. Dopamine in Drug Abuse and  
664 Addiction. *Archives of Neurology* 64:1575–1579. DOI: 10.1001/archneur.64.11.1575.
- 665 Wall MB., Pope R., Freeman TP., Kowalczyk OS., Demetriou L., Mokrysz C., Hindocha C., Lawn  
666 W., Bloomfield MAP., Freeman AM., Feilding A., Nutt DJ., Curran HV. 2019. Dissociable  
667 effects of cannabis with and without cannabidiol on the human brain’s resting-state  
668 functional connectivity. *Journal of Psychopharmacology* 33:822–830. DOI:  
669 10.1177/0269881119841568.
- 670 Walsh Z., Gonzalez R., Crosby K., S. Thiessen M., Carroll C., Bonn-Miller MO. 2017. Medical

671 cannabis and mental health: A guided systematic review. *Clinical Psychology Review*

672 51:15–29. DOI: 10.1016/j.cpr.2016.10.002.

673

674

675 **Supplementary Figures**

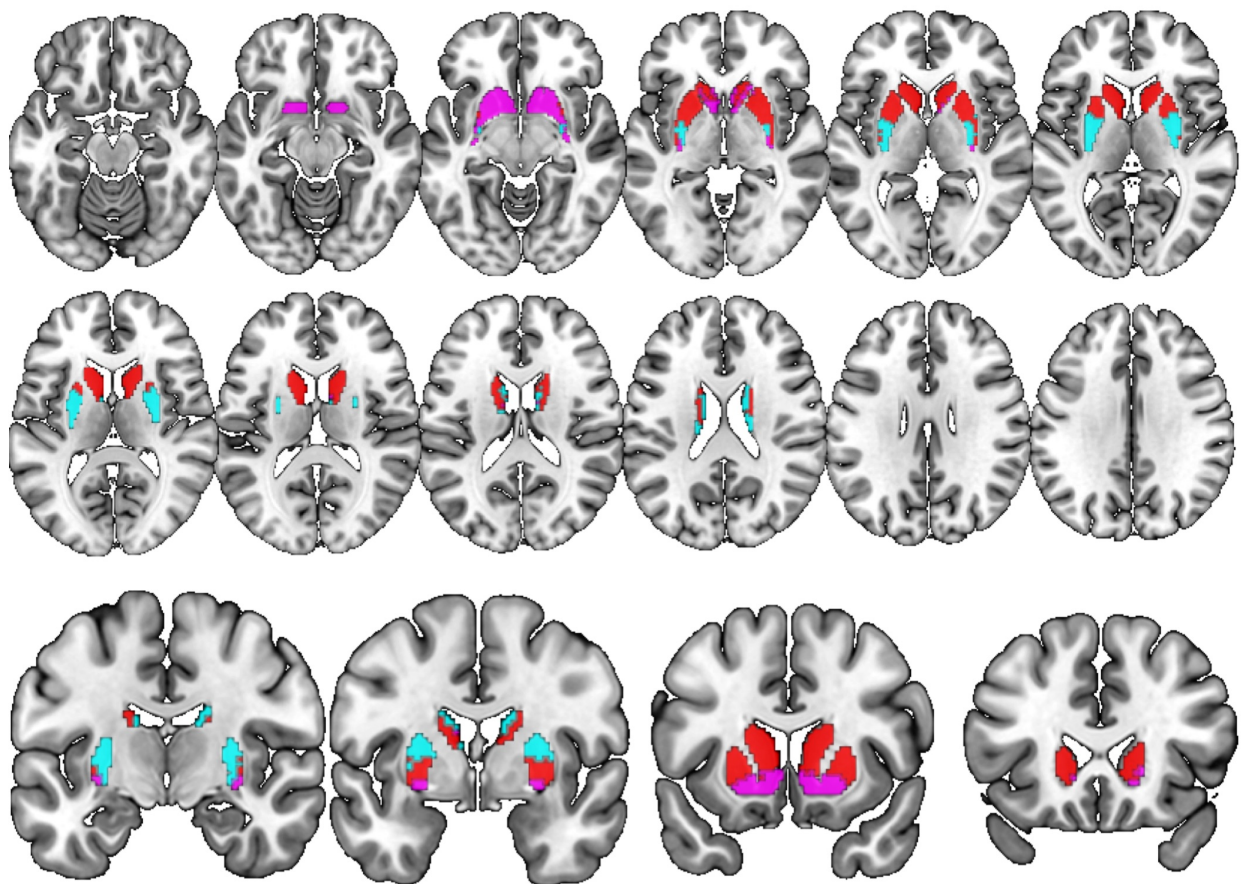

676

677

678

679

680

Figure S1. Seed regions used in the functional connectivity analyses, derived from the atlas provided by Tziortzi et al. (2013). Associative striatum in red, limbic striatum in pink, and sensorimotor striatum in cyan.



### Associative network

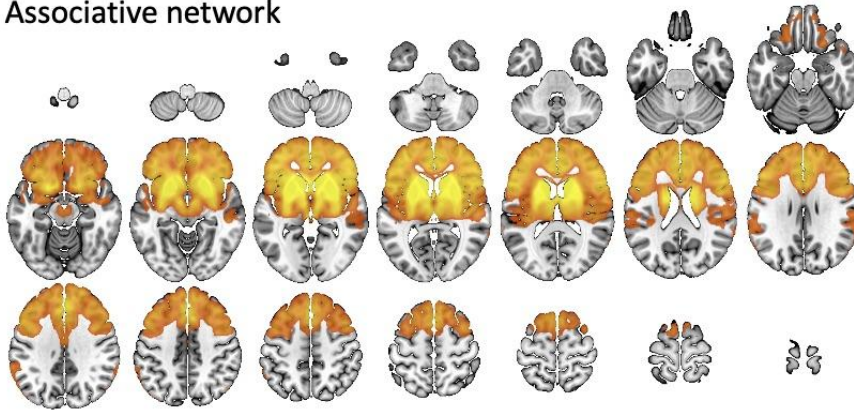

### Limbic network

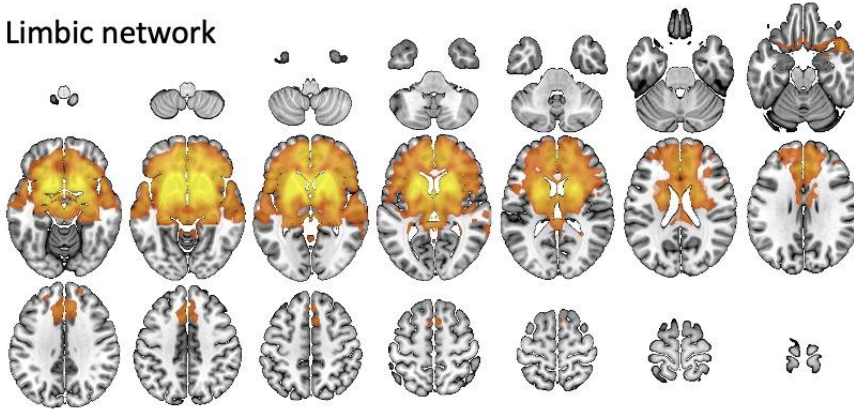

### Sensorimotor network

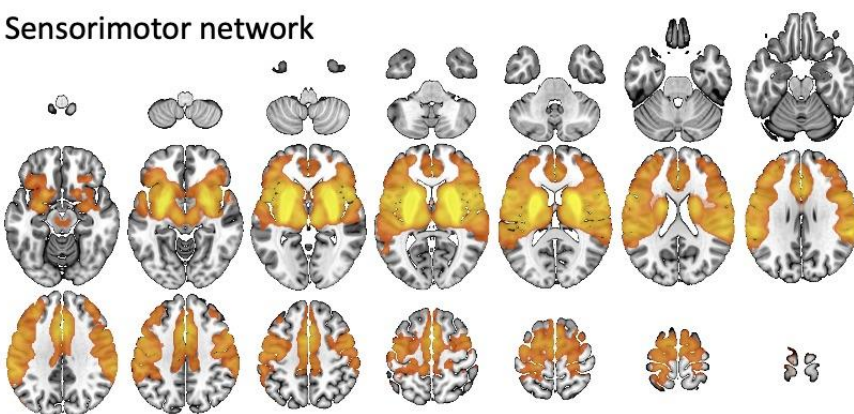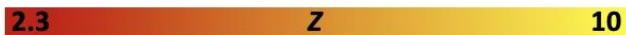

681

682 Figure S2. Group-mean (all subjects, all scans) connectivity networks derived using the  
683 seed-regions shown in figure S1, and the resting-state fMRI data from study 1 (N=17).

684 Top panel = associative network, middle panel = limbic network, bottom panel =

685 sensorimotor network. Statistical thresholds are  $Z=2.3$ ,  $p < 0.05$  (cluster-corrected).

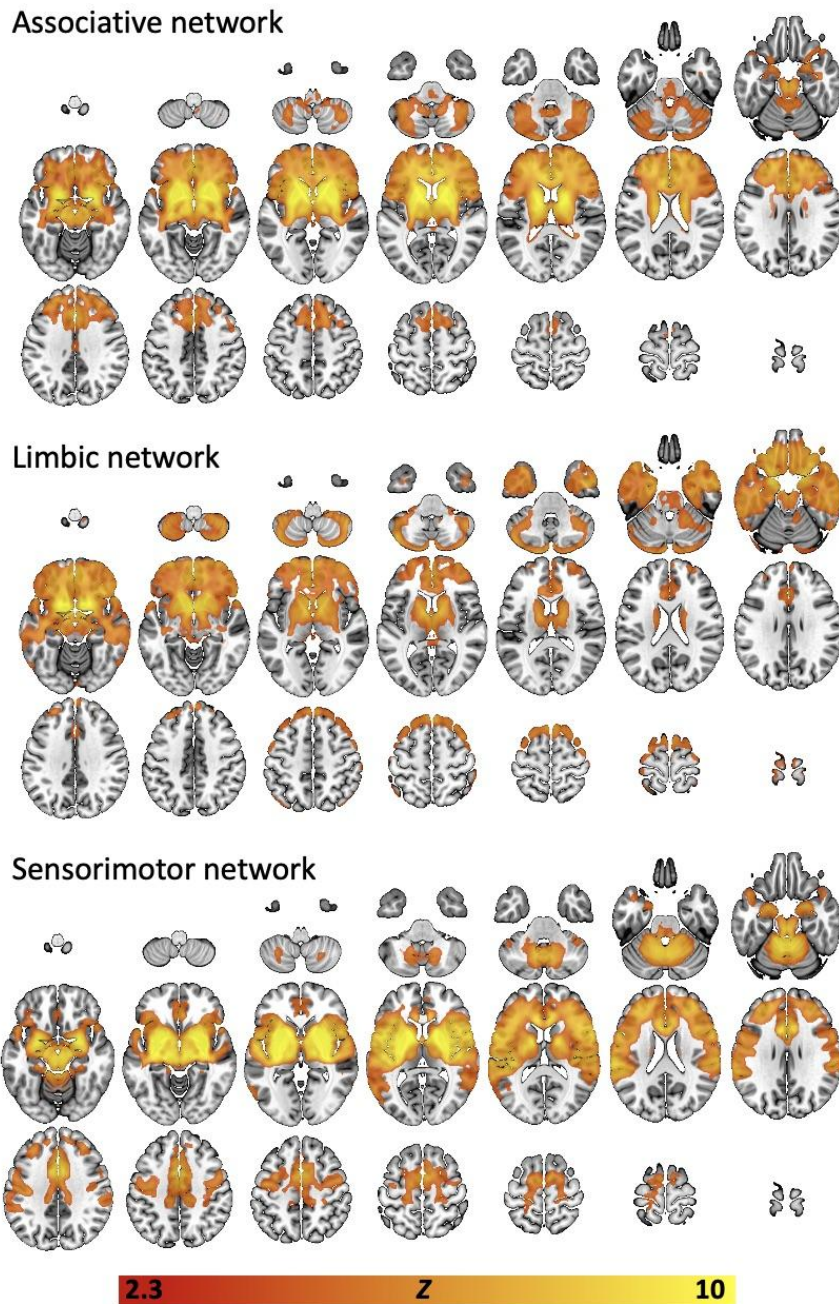

686

687 Figure S3. Group-mean (all subjects, all scans) connectivity networks derived using the  
688 seed-regions shown in figure S1, and the resting-state fMRI data from study 2 (N=23).

689 Top panel = associative network, middle panel = limbic network, bottom panel =

690 sensorimotor network. Statistical thresholds are  $Z=2.3$ ,  $p < 0.05$  (cluster-corrected).
